# Supplementary material
Source: PubMed Central journal article supplement (PMC5868275)
Supplement: supp_RA117.001352_134511_1_supp_56673_p2l0gl.pdf [file supp_RA117.001352_134511_1_supp_56673_p2l0gl.pdf]

## Supporting Information

**A long noncoding (lnc) RNA governs expression of the phosphate transporter Pho84 in fission yeast and has cascading effects on the flanking *pvt* lncRNA and *pho1* genes**

Angad Garg, Ana M. Sanchez, Stewart Shuman, and Beate Schwer

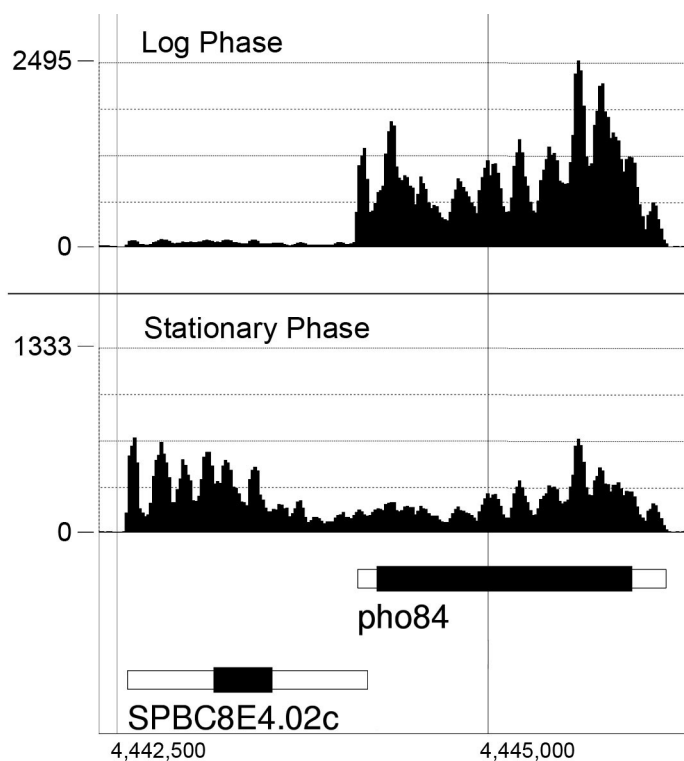

Figure S1. Read densities of RNA-seq data (Rhind et al. 2011) from log phase and early stationary phase *S. pombe* cells are plotted on the y-axis as a function of position across the SPBC8E4.02c and *pho84* gene loci (x-axis), shown as they are annotated in Pombase. ORFs are indicated by black bars and UTRs by clear bars. Chromosome II coordinates are shown at bottom.

TAATTAAATCATAATGCCGCATACTTTGCTTTTTTTCTTGGTACATATAATT  
 TTATAATACTTAAAACATGATTCCTTCGTCTTTTGAAAAGTTTAATATACC  
 TTGGTTACTGCTTCTGTTACCAGGTTTGGCCAAATATTTAGTTTTGTTTCGTT  
 TGCTTTAATAAAAGGGGACAGTTTTTCGGTTAGTTTGTGTTTATTCAGCGATA  
 ATTAATAAAATTTTAAAATTGACGAAATAACGCTCTCT

Figure S2. *pho84* mRNA poly(A) sites. The sequence of the *pho84* 3'UTR is shown with the translation stop codon in red and underlined. cDNA junctions to a poly(A) tail identified by 3'RACE and sequencing of 16 independent cDNA clones are indicated by triangles, with the number of clones corresponding to each poly(A) sites specified immediately to the right of each symbol. The two clusters of poly(A) sites are located downstream of two canonical AATAAA polyadenylation signals (highlighted in white font on black background).
